# Supplementary material for: Improving Dietary Intake of Essential Nutrients Can Ameliorate Inflammation in Patients with Diabetic Foot Ulcers
Source: MDPI journal article supplement (doi:10.3390/nu14122393), 2022-06-09
Supplement: s1 [file s1]

**Table S1.** Nutrient composition of one serving (237 ml) of the nutritional supplement.

| Nutrient                    | Amount |
|-----------------------------|--------|
| Calories(kcal)              | 250    |
| calories from fat(kcal)     | 110    |
| Total Fat(g)                | 12     |
| saturated Fat(g)            | 1.5    |
| trans Fat(g)                | 0      |
| cholesterol(mg)             | <5     |
| Sodium(mg)                  | 270    |
| Potassium(mg)               | 260    |
| Total Carbohydrate(g)       | 23     |
| dietary Fiber(g)            | 3      |
| sugars(g)                   | 6      |
| Protein <sup>1</sup> (g)    | 14     |
| Vitamin A <sup>2</sup> (IU) | 1250   |
| Vitamin C (mg)              | 102    |
| Calcium (mg)                | 250    |
| Iron (mg)                   | 3.6    |
| Vitamin D (IU)              | 240    |
| Vitamin E (IU)              | 33     |
| Vitamin K (mcg)             | 16     |
| Thiamin (mg)                | 0.3    |
| Riboflavin (mg)             | 0.34   |
| Niacin (mg)                 | 4      |
| Vitamin B6 (mg)             | 0.4    |
| Folic Acid (mcg)            | 80     |
| Vitamin B12 (mcg)           | 1.2    |
| Biotin (mcg)                | 60     |
| Pantothenic Acid (mg)       | 2      |
| Phosphorus (mg)             | 200    |
| Iodine (mcg)                | 30     |
| Magnesium (mg)              | 80     |
| Zinc (mg)                   | 3      |
| Selenium (mcg)              | 14     |
| Copper (mg)                 | 0.4    |
| Manganese (mg)              | 0.4    |
| Chromium (mcg)              | 24     |
| Molybdenum (mcg)            | 15     |
| Chloride (mg)               | 204    |
| L-carnitine (mg)            | 25     |
| Taurine (mg)                | 20     |
| Inositol (mg)               | 200    |

<sup>1</sup> Includes protein from caseinate and L-arginine <sup>2</sup> Includes 45% of vitamin A activity from beta-carotene.
